# Supplementary material for: No widespread induction of cell death genes occurs in pure motoneurons in an amyotrophic lateral sclerosis mouse model
Source: Oxford University Press journal article supplement (doi:10.1093/hmg/ddi357), 2005-09-28
Supplement: ddi357_Supplementary_Data.zip [file ddi357_Supplementary_Data.zip]

**Supplementary Table 1 :****Comparison of genes commonly de-regulated at symptomatic ages (90 and 120 day old) in SOD1<sup>G93A</sup> motoneurons using microarrays**

List of the principal genes whose transcripts were regulated by 1.5- fold or more ( $p < 0.05$ ) in mutant mice at two symptomatic ages. RNA was extracted from 2000 - 2400 microdissected motoneurons issued from one animal. Three chips were analyzed for each condition (control and mutant). Gene expression levels were compared in disease versus control animals. Fold change was calculated as the ratio between the average values of expression in mutant animals relative to the average values of controls; in all comparisons, a positive value indicates a higher level of expression in mutant animals versus negative numbers that show a higher level in controls.

| Affymetrix probe set ID                                                                       | Gene bank | Gene Name                                                               | Fold change P 90 | Fold change P 120 |
|-----------------------------------------------------------------------------------------------|-----------|-------------------------------------------------------------------------|------------------|-------------------|
| <b>Genes involved in cell growth and/or maintenance up-regulated at both symptomatic ages</b> |           |                                                                         |                  |                   |
| 1449133_at                                                                                    | NM_009264 | Small proline-rich protein 1A                                           | 14.46            | 18.09             |
| 1449363_at                                                                                    | BC019946  | Activating transcription factor 3                                       | 10.11            | 10.46             |
| 1419691_at                                                                                    | NM_009921 | Cathelicidin antimicrobial peptide                                      | 7.95             | 11.59             |
| 1434129_s_at                                                                                  | BG917242  | Lipoma HMGIC fusion partner-like 2                                      | 4.79             | 4.05              |
| 1426852_x_at                                                                                  | X96585    | Nephroblastoma overexpressed gene                                       | 4.59             | 3.73              |
| 1423537_at                                                                                    | BB622036  | Growth associated protein 43                                            | 4.04             | 3.32              |
| 1417381_at                                                                                    | NM_007572 | Complement component 1, alpha polypeptide                               | 3.74             | 8.91              |
| 1422557_s_at                                                                                  | NM_013602 | Metallothionein 1                                                       | 3.29             | 2.87              |
| 1437726_x_at                                                                                  | BB111335  | Complement component 1, beta polypeptide                                | 3.23             | 7.16              |
| 1416431_at                                                                                    | NM_026473 | Tubulin, beta 6                                                         | 2.93             | 2.62              |
| 1436905_x_at                                                                                  | BB218107  | Lsosomal-associated protein transmembrane 5                             | 2.82             | 5.94              |
| 1417256_at                                                                                    | NM_008607 | Matrix metalloproteinase 13                                             | 2.74             | 6.17              |
| 1428942_at                                                                                    | AA796766  | Metallothionein 2                                                       | 2.65             | 2.58              |
| 1415904_at                                                                                    | BC003305  | Lipoprotein lipase                                                      | 2.63             | 2.77              |
| 1417516_at                                                                                    | NM_007837 | DNA-damage inducible transcript 3                                       | 2.41             | 2.33              |
| 1438761_a_at                                                                                  | C81193    | Ornithine decarboxylase, structural 1                                   | 2.39             | 1.77              |
| 1421840_at                                                                                    | BB144704  | ATP-binding cassette, sub-family A (ABC1), member 1                     | 2.28             | 2.04              |
| 1417605_s_at                                                                                  | NM_133926 | Calcium/calmodulin-dependent protein kinase I                           | 2.24             | 2.40              |
| 1421375_a_at                                                                                  | NM_011313 | S100 calcium binding protein A6 (calcyclin)                             | 2.16             | 3.34              |
| 1416318_at                                                                                    | AF426024  | Serine (or cysteine) proteinase inhibitor, clade B, member 1a           | 2.10             | 2.69              |
| 1438606_a_at                                                                                  | BB814844  | Chloride intracellular channel 4 (mitochondrial)                        | 2.07             | 1.66              |
| 1420502_at                                                                                    | NM_009121 | Spermidine/spermine N1-acetyl transferase 1                             | 2.04             | 1.84              |
| 1422302_s_at                                                                                  | NM_008049 | Ferritin light chain 1 and 2, glutamate receptor, ionotropic, kainate 3 | 2.00             | 2.81              |
| 1419441_at                                                                                    | NM_007475 | Acidic ribosomal phosphoprotein P0                                      | 1.92             | 2.09              |
| 1438629_x_at                                                                                  | AV166504  | Granulin                                                                | 1.87             | 2.89              |
| 1424635_at                                                                                    | BC018223  | Eukaryotic translation elongation factor 1 alpha 1                      | 1.85             | 2.80              |
| 1448232_x_at                                                                                  | NM_009448 | Tubulin, alpha 6                                                        | 1.76             | 2.55              |
| 1450150_a_at                                                                                  | NM_016738 | Ribosomal protein L13                                                   | 1.64             | 1.77              |
| 1415942_at                                                                                    | NM_052835 | Ribosomal protein 10                                                    | 1.64             | 1.59              |
| 1460180_at                                                                                    | NM_010422 | Hexosaminidase B                                                        | 1.50             | 2.71              |

**Up-regulated at both symptomatic ages**

|              |           |                                                       |      |       |
|--------------|-----------|-------------------------------------------------------|------|-------|
| 1438118_x_at | AV147875  | Vimentin                                              | 8.96 | 4.03  |
| 1425763_x_at | BC019425  | Immunoglobulin heavy chain (J558 family)              | 8.52 | 5.26  |
| 1449401_at   | NM_007574 | Complement component 1, gamma polypeptide             | 8.15 | 6.86  |
| 1436996_x_at | AV066625  | P lysozyme structural                                 | 6.19 | 9.78  |
| 1448756_at   | NM_009114 | S100 calcium binding protein A9 (calgranulin B)       | 5.72 | 9.18  |
| 1419394_s_at | NM_013650 | S100 calcium binding protein A8 (calgranulin A)       | 5.48 | 13.53 |
| 1419764_at   | NM_009892 | Chitinase 3-like 3                                    | 5.04 | 6.04  |
| 1427076_at   | L20315    | Macrophage expressed gene 1                           | 4.85 | 8.51  |
| 1448591_at   | NM_021281 | Cathepsin S                                           | 4.55 | 5.38  |
| 1418722_at   | NM_008694 | Neutrophilic granule protein                          | 4.47 | 5.54  |
| 1421799_at   | NM_011910 | Urotensin 2                                           | 3.70 | 2.38  |
| 1437621_x_at | AV216768  | Similar to 3-phosphoglycerate dehydrogenase           | 3.57 | 2.39  |
| 1460227_at   | BC008107  | Tissue inhibitor of metalloproteinase 1               | 3.20 | 6.42  |
| 1460351_at   | BC021916  |                                                       | 3.16 | 4.06  |
| 1434442_at   | BB667844  | DNA segment, Chr 5, ERATO Doi 593, expressed          | 2.84 | 3.56  |
| 1456700_x_at | BB100920  | Myristoylated alanine rich protein kinase C substrate | 2.81 | 3.34  |
| 1428361_x_at | AK011116  |                                                       | 2.55 | 3.65  |
| 1429051_s_at | BE825056  | RIKEN cDNA 6230403H02 gene                            | 2.39 | 2.25  |
| 1419905_s_at | AV026552  |                                                       | 2.41 | 5.38  |
| 1448577_x_at | BC004829  | Synaptogyrin 2                                        | 2.21 | 2.46  |
| 1434449_at   | BB193413  | Aquaporin 4                                           | 2.08 | 2.68  |
| 1435745_at   | BI408317  | RIKEN cDNA 5031439G07 gene                            | 1.90 | 2.17  |
| 1433507_a_at | BE553881  | High mobility group nucleosomal binding domain 2      | 1.69 | 1.96  |
| 1417868_a_at | NM_022325 | Cathepsin Z                                           | 1.62 | 2.95  |
| 1433689_s_at | BI456571  | Ribosomal protein S9                                  | 1.60 | 1.94  |
| 1424048_a_at | BC024618  | NAD(P)H:quinone oxidoreductase type 3, polypeptide A2 | 1.55 | 1.79  |

**Genes down-regulated at both symptomatic ages**

|              |           |                                                                                   |       |       |
|--------------|-----------|-----------------------------------------------------------------------------------|-------|-------|
| 1427351_s_at | BB22639   | Immunoglobulin heavy chain 6 (heavy chain of IgM)                                 | -3.79 | -2.25 |
| 1451499_at   | AF000969  | Ca <sup>2+</sup> -dependent activator protein for secretion 2                     | -3.74 | -3.03 |
| 1441894_s_at | BB071890  | GRP1-associated scaffold protein                                                  | -3.24 | -2.46 |
| 1439622_at   | AV291679  | Ras association (RalGDS/AF-6) domain family 4                                     | -2.41 | -1.95 |
| 1430776_s_at | AK017778  | Ankyrin repeat domain 24                                                          | -2.22 | -2.21 |
| 1455883_a_at | BB269910  | Leucine rich repeat transmembrane neuronal 1                                      | -2.17 | -2.50 |
| 1459903_at   | AA144045  | Sema domain, immunoglobulin domain (Ig), and GPI membrane anchor, (semaphorin) 7A | -1.96 | -1.70 |
| 1416427_at   | NM_017367 | Cyclin I                                                                          | -1.96 | -1.81 |
| 1423608_at   | BI966443  | Integral membrane protein 2A                                                      | -1.91 | -2.89 |
| 1435815_at   | AW541598  | Similar to melanoma antigen, family A, 10                                         | -1.89 | -1.97 |
| 1424902_at   | AF378760  | Plexin domain containing 1                                                        | -1.86 | -2.13 |
| 1451440_at   | AF311699  | chondrolectin                                                                     | -1.75 | -3.44 |
| 1450202_at   | AI385669  | Glutamate receptor, ionotropic, NMDA1 (zeta 1)                                    | -1.75 | -2.08 |
| 1441049_at   | AV328356  | Potassium voltage-gated channel, shaker-related, member 6                         | -1.69 | -2.00 |

**Supplementary Table 2 :****Comparison of genes differentially expressed only at early symptomatic stages (90 day old) in SOD1<sup>G93A</sup> motoneurons using microarrays**

List of the principal genes whose transcripts were regulated by 1.5- fold or more ( $p < 0.05$ ) in mutant mice at an early symptomatic age. RNA was extracted from 2000 - 2400 microdissected motoneurons issued from one animal. Three chips were analyzed for each condition (control and mutant). Gene expression levels were compared in disease versus control animals. Fold change was calculated as the ratio between the average values of expression in mutant animals relative to the average values of controls; in all comparisons, a positive value indicates a higher level of expression in mutant animals versus negative numbers that show a higher level in controls.

| Affymetrix probe set ID                                                                       | Gene bank | Gene Name                                                                                  | Fold change |
|-----------------------------------------------------------------------------------------------|-----------|--------------------------------------------------------------------------------------------|-------------|
| <b>Genes involved in cell growth and/or maintenance up-regulated at early symptomatic age</b> |           |                                                                                            |             |
| 1416067_at                                                                                    | NM_013562 | Interferon-related developmental regulator 1                                               | 2.10        |
| 1415897_a_at                                                                                  | BI150149  | Microsomal glutathione S-transferase 1                                                     | 1.96        |
| 1451803_a_at                                                                                  | U48800    | Vascular endothelial growth factor B                                                       | 1.90        |
| 1451064_a_at                                                                                  | BC004827  | Phosphoserine aminotransferase 1                                                           | 1.86        |
| 1423080_at                                                                                    | AK002902  | Translocase of outer mitochondrial membrane 20 homolog                                     | 1.81        |
| 1417492_at                                                                                    | M14222    | Cathepsin B                                                                                | 1.75        |
| 1425364_a_at                                                                                  | U25708    | Solute carrier family 3 (activators of dibasic and neutral amino acid transport), member 2 | 1.67        |
| 1425964_x_at                                                                                  | U03561    | Heat shock protein 1                                                                       | 1.62        |
| 1448430_a_at                                                                                  | NM_013608 | Nascent polypeptide-associated complex alpha polypeptide                                   | 1.60        |
| 1450815_s_at                                                                                  | NM_024166 | Coiled-coil-helix-coiled-coil-helix domain containing 2                                    | 1.59        |
| 1436760_a_at                                                                                  | BQ127746  | Ribosomal protein S8                                                                       | 1.54        |
| <b>Up-regulated at early symptomatic ages</b>                                                 |           |                                                                                            |             |
| 1417928_at                                                                                    | NM_019417 | PDZ and LIM domain 4                                                                       | 6.58        |
| 1419127_at                                                                                    | NM_023456 | Neuropeptide Y                                                                             | 5.92        |
| 1415845_at                                                                                    | AV336547  | Synaptotagmin 4                                                                            | 2.48        |
| 1448392_at                                                                                    | NM_009242 | Secreted acidic cysteine rich glycoprotein                                                 | 2.11        |
| 1452428_a_at                                                                                  | AI099111  | Beta-2 microglobulin                                                                       | 1.96        |
| 1451310_a_at                                                                                  | J02583    | Cathepsin L                                                                                | 1.74        |
| 1455002_at                                                                                    | AV331223  | Protein tyrosine phosphatase 4a1                                                           | 1.58        |
| <b>Down-regulated at early symptomatic age</b>                                                |           |                                                                                            |             |
| 1429316_at                                                                                    | AK018120  | RasGEF domain family, member 1A                                                            | -3.03       |
| 1447771_at                                                                                    | AW050081  |                                                                                            | -2.48       |
| 1449571_at                                                                                    | M59811    | Thyrotropin releasing hormone receptor                                                     | -2.37       |
| 1449899_at                                                                                    | NM_130455 | Glutamate receptor, ionotropic, NMDA3B                                                     | -2.25       |
| 1457587_at                                                                                    | BB196645  | Adult male spinal cord cDNA, RIKEN, clone:A330095G09                                       | -2.04       |
| 1435125_at                                                                                    | BB303627  | Transcribed locus                                                                          | -2.01       |
| 1458396_at                                                                                    | BB452660  | 15 days embryo head cDNA, RIKEN, clone:D930017N16                                          | -1.92       |
| 1437724_x_at                                                                                  | BB206460  | Phosphatidylinositol membrane-associated 1                                                 | -1.91       |
| 1428642_at                                                                                    | AK018094  | Solute carrier family 35, member D3                                                        | -1.88       |
| 1457248_x_at                                                                                  | BB554029  | Hydroxysteroid (17-beta) dehydrogenase 7                                                   | -1.85       |
| 1457829_at                                                                                    | BM199355  | Calmegin                                                                                   | -1.78       |
| 1457979_at                                                                                    | BM938335  | Adult male hypothalamus cDNA, RIKEN A230017C18                                             | -1.76       |

**Supplementary Table 3 :****Comparison of genes differentially expressed only at the end stage of the disease (120 day old) in SOD1<sup>G93A</sup> motoneurons using microarrays**

List of the principal genes whose transcripts were regulated by 1.5- fold or more ( $p < 0.05$ ) in mutant mice at the end stage of the disease. RNA was extracted from 2000 - 2400 microdissected motoneurons issued from one animal. Three chips were analyzed for each condition (control and mutant). Gene expression levels were compared in disease versus control animals. Fold change was calculated as the ratio between the average values of expression in mutant animals relative to the average values of controls; in all comparisons, a positive value indicates a higher level of expression in mutant animals versus negative numbers that show a higher level in controls.

| Affymetrix probe set ID                                                                       | Gene bank | Gene Name                                                                                                 | Fold change |
|-----------------------------------------------------------------------------------------------|-----------|-----------------------------------------------------------------------------------------------------------|-------------|
| <b>Genes involved in cell growth and/or maintenance up-regulated at the disease end stage</b> |           |                                                                                                           |             |
| 1424638_at                                                                                    | AK007630  | Cyclin-dependent kinase inhibitor 1A (P21)                                                                | 30.27       |
| 1415927_at                                                                                    | NM_009608 | Actin, alpha, cardiac                                                                                     | 8.08        |
| 1452114_s_at                                                                                  | BF225802  | Insulin-like growth factor binding protein 5                                                              | 7.57        |
| 1443702_at                                                                                    | BE197560  | Microtubule-associated protein 4                                                                          | 6.60        |
| 1427306_at                                                                                    | X83932    | Ryanodine receptor 1, skeletal muscle                                                                     | 6.17        |
| 1438175_x_at                                                                                  | BB288010  | Myomesin 2                                                                                                | 5.66        |
| 1423427_at                                                                                    | AI323434  | Adenylate cyclase activating polypeptide 1                                                                | 5.58        |
| 1449519_at                                                                                    | NM_007836 | Growth arrest and DNA-damage-inducible 45 alpha                                                           | 5.29        |
| 1417023_a_at                                                                                  | NM_024406 | Fatty acid binding protein 4, adipocyte                                                                   | 4.87        |
| 1437313_x_at                                                                                  | C85885    | High mobility group box 2                                                                                 | 4.17        |
| 1416889_at                                                                                    | NM_009405 | Troponin I, skeletal, fast 2                                                                              | 4.14        |
| 1449434_at                                                                                    | NM_007606 | Carbonic anhydrase 3                                                                                      | 3.55        |
| 1427445_a_at                                                                                  | BC025840  | Similar to titin isoform N2-A; connectin; CMH9, included; cardiomyopathy, dilated 1G (autosomal dominant) | 3.44        |
| 1421027_a_at                                                                                  | AI595932  | Myocyte enhancer factor 2C                                                                                | 3.44        |
| 1450118_a_at                                                                                  | NM_011620 | Troponin T3, skeletal, fast                                                                               | 3.43        |
| 1425028_a_at                                                                                  | BC024358  | Tropomyosin 2, beta                                                                                       | 3.21        |
| 1427735_a_at                                                                                  | M12233    | Actin, alpha 1, skeletal muscle                                                                           | 3.21        |
| 1418773_at                                                                                    | BE652876  | Fatty acid desaturase 3                                                                                   | 3.11        |
| 1417409_at                                                                                    | NM_010591 | Jun oncogene                                                                                              | 2.99        |
| 1423049_a_at                                                                                  | AK002271  | Tropomyosin 1, alpha                                                                                      | 2.97        |
| 1444083_at                                                                                    | BM122177  | Titin                                                                                                     | 2.69        |
| 1435751_at                                                                                    | BG791642  | ATP-binding cassette, sub-family C, member 9                                                              | 2.44        |
| 1423233_at                                                                                    | BB831146  | CCAAT/enhancer binding protein (C/EBP), delta                                                             | 2.42        |
| 1428936_at                                                                                    | BI080417  | RIKEN cDNA 2810442I22 gene                                                                                | 2.26        |
| 1417013_at                                                                                    | AF250139  | Heat shock 27kDa protein 8                                                                                | 2.23        |
| 1423223_a_at                                                                                  | BB796358  | Peroxiredoxin 6                                                                                           | 2.22        |
| 1427868_x_at                                                                                  | AJ002522  | Myosin, heavy polypeptide 1, skeletal muscle, adult                                                       | 2.21        |
| 1450779_at                                                                                    | NM_021272 | Fatty acid binding protein 7, brain                                                                       | 2.21        |
| 1420375_at                                                                                    | NM_008443 | Kinesin family member 3A                                                                                  | 2.10        |
| 1426805_at                                                                                    | AW701251  | SWI/SNF related, matrix associated, actin dependent regulator of chromatin, subfamily a, member 4         | 2.06        |

|                                                    |           |                                                                |       |
|----------------------------------------------------|-----------|----------------------------------------------------------------|-------|
| 1453851_a_at                                       | AK007410  | Growth arrest and DNA-damage-inducible 45 gamma                | 2.03  |
| 1433508_at                                         | AV025472  | Core promoter element binding protein                          | 1.95  |
| 1417533_a_at                                       | NM_010580 | Integrin beta 5                                                | 1.95  |
| 1424143_a_at                                       | AF477481  | Retroviral integration site 2                                  | 1.91  |
| 1416344_at                                         | NM_010685 | Lysosomal membrane glycoprotein 2                              | 1.80  |
| 1455168_a_at                                       | BM210111  | Guanine nucleotide binding protein, beta 2                     | 1.70  |
| 1422459_a_at                                       | NM_011875 | Proteasome 26S subunit, non-ATPase, 13                         | 1.67  |
| 1416947_s_at                                       | NM_130864 | Acetyl-Coenzyme A acyltransferase 1, 3-ketoacyl-CoA thiolase B | 1.67  |
| 1452158_at                                         | BM238943  | Glutamyl-prolyl-tRNA synthetase                                | 1.66  |
| 1426083_a_at                                       | L16846    | B-cell translocation gene 1, anti-proliferative                | 1.63  |
| 1448128_at                                         | NM_008906 | Protective protein for beta-galactosidase                      | 1.62  |
| 1448118_a_at                                       | NM_009983 | Cathepsin D                                                    | 1.61  |
| 1419091_a_at                                       | NM_007585 | Annexin A2                                                     | 1.56  |
| 1422475_a_at                                       | NM_016959 | Ribosomal protein S3a                                          | 1.55  |
| <b>Genes up-regulated at the disease end stage</b> |           |                                                                |       |
| 1420884_at                                         | AK008863  | Sarcolipin                                                     | 85.82 |
| 1437324_x_at                                       | BB504826  | Fibromodulin                                                   | 15.75 |
| 1418199_at                                         | NM_053149 | Hemogen                                                        | 12.98 |
| 1444494_at                                         | W09692    | Kelch repeat and BTB (POZ) domain containing 10                | 11.89 |
| 1456014_s_at                                       | BB113173  | cDNA sequence BC032204                                         | 10.46 |
| 1426808_at                                         | X16834    | Lectin, galactose binding, soluble 3                           | 10.09 |
| 1450857_a_at                                       | BF227507  | Procollagen, type I, alpha 2                                   | 9.10  |
| 1455494_at                                         | BI794771  | Transcribed locus                                              | 8.50  |
| 1458368_at                                         | BG794681  | Myosin, heavy polypeptide 4, skeletal muscle                   | 7.34  |
| 1426144_x_at                                       | AF223417  | Triadin                                                        | 7.22  |
| 1448021_at                                         | AA266723  | Transcribed locus                                              | 6.18  |
| 1431609_a_at                                       | AK008391  | Acid phosphatase 5, tartrate resistant                         | 5.85  |
| 1423760_at                                         | M27130    | CD44 antigen                                                   | 5.67  |
| 1420699_at                                         | NM_020008 | C-type lectin domain family 7, member a                        | 5.63  |
| 1449164_at                                         | BC021637  | CD68 antigen                                                   | 5.08  |
| 1456586_x_at                                       | BB139464  | Major vault protein                                            | 4.83  |
| 1418021_at                                         | NM_009780 | Complement component 4 (within H-2S)                           | 4.43  |
| 1450652_at                                         | NM_007802 | Cathepsin K                                                    | 4.23  |
| 1422903_at                                         | NM_010745 | Lymphocyte antigen 86                                          | 4.22  |
| 1419872_at                                         | AI323359  |                                                                | 4.09  |
| 1434437_x_at                                       | AV301324  | Ribonucleotide reductase M2                                    | 3.90  |
| 1417464_at                                         | NM_009394 | Troponin C2, fast                                              | 3.75  |
| 1433428_x_at                                       | AW321975  | Transglutaminase 2, C polypeptide                              | 3.43  |
| 1448891_at                                         | BC016551  | Macrophage scavenger receptor 2                                | 3.37  |
| 1419873_s_at                                       | AI323359  | Colony stimulating factor 1 receptor                           | 3.37  |
| 1417081_a_at                                       | BC004829  | Synaptogyrin 2                                                 | 3.21  |
| 1422860_at                                         | NM_024435 | Neurotensin                                                    | 3.20  |
| 1453125_at                                         | BM508495  | RIKEN cDNA 6230403H02 gene                                     | 3.15  |
| 1420664_s_at                                       | NM_011171 | Protein C receptor, endothelial                                | 3.04  |
| 1454137_s_at                                       | AK009636  | Hemochromatosis type 2 (juvenile) (human homolog)              | 2.96  |
| 1418365_at                                         | NM_007801 | Cathepsin H                                                    | 2.95  |
| 1457633_x_at                                       | AV005759  | Cytochrome c oxidase, subunit VI a, polypeptide 2              | 2.87  |
| 1452679_at                                         | AA986082  | RIKEN cDNA 2410129E14 gene                                     | 2.84  |
| 1441811_x_at                                       | AU040201  | RIKEN cDNA 0610011I04 gene                                     | 2.83  |

|                                                      |           |                                                                                 |       |
|------------------------------------------------------|-----------|---------------------------------------------------------------------------------|-------|
| 1427633_a_at                                         | AF439513  | Pregnancy-associated plasma protein A                                           | 2.74  |
| 1416382_at                                           | NM_009982 | Cathepsin C                                                                     | 2.62  |
| 1425545_x_at                                         | M86502    | Histocompatibility 2, D region                                                  | 2.56  |
| 1428409_at                                           | AK013287  | Mak3 homolog (S. cerevisiae)                                                    | 2.45  |
| 1438948_x_at                                         | AV101079  | Benzodiazepine receptor, peripheral                                             | 2.39  |
| 1455033_at                                           | BB325849  | RIKEN cDNA B430201A12 gene                                                      | 2.34  |
| 1422650_a_at                                         | NM_024182 | RIO kinase 3 (yeast)                                                            | 2.34  |
| 1418393_a_at                                         | NM_008398 | Integrin alpha 7                                                                | 2.29  |
| 1433465_a_at                                         | BB234337  | Expressed sequence AI467606                                                     | 2.28  |
| 1448748_at                                           | AF181829  | Pleckstrin                                                                      | 2.24  |
| 1420760_s_at                                         | NM_008681 | N-myc downstream regulated-like                                                 | 2.18  |
| 1448154_at                                           | NM_013864 | N-myc downstream regulated gene 2                                               | 2.06  |
| 1454714_x_at                                         | AA561726  | Similar to 3-phosphoglycerate dehydrogenase                                     | 2.05  |
| 1460436_at                                           | BI652065  | N-deacetylase/N-sulfotransferase (heparan glucosaminyl) 1                       | 2.00  |
| 1451201_s_at                                         | BC010331  | Ribonuclease/angiogenin inhibitor 1                                             | 1.97  |
| 1422555_s_at                                         | BI662324  | Guanine nucleotide binding protein, alpha 13                                    | 1.97  |
| 1447676_x_at                                         | AV074236  | S100 calcium binding protein A16                                                | 1.97  |
| 1416028_a_at                                         | NM_008258 | Hematological and neurological expressed sequence 1                             | 1.96  |
| 1449556_at                                           | NM_010398 | Histocompatibility 2, T region locus 23                                         | 1.95  |
| 1452203_at                                           | AV313559  | RIKEN cDNA 5830411E10 gene                                                      | 1.94  |
| 1438377_x_at                                         | BB497312  | Solute carrier family 13 (sodium-dependent dicarboxylate transporter), member 3 | 1.92  |
| 1420895_at                                           | BM248342  | Transforming growth factor, beta receptor I                                     | 1.88  |
| 1452110_at                                           | BB757908  | 5-methyltetrahydrofolate-homocysteine methyltransferase reductase               | 1.88  |
| 1439399_a_at                                         | BB493265  | RNA, U22 small nucleolar                                                        | 1.85  |
| 1419100_at                                           | NM_009252 | Serine (cysteine) proteinase inhibitor, clade A, member 3N                      | 1.84  |
| 1435910_at                                           | BM235658  |                                                                                 | 1.82  |
| 1423985_at                                           | BC002316  | Guanine nucleotide binding protein, gamma 5 subunit                             | 1.78  |
| 1417676_a_at                                         | NM_011216 | Protein tyrosine phosphatase, receptor type, O                                  | 1.78  |
| 1439740_s_at                                         | AU018180  | Expressed sequence AI481316                                                     | 1.76  |
| 1426724_at                                           | AI314104  | Calponin 3, acidic                                                              | 1.75  |
| 1435190_at                                           | BB378591  | Cell adhesion molecule with homology to L1CAM                                   | 1.73  |
| 1422156_a_at                                         | NM_008503 | Ribosomal protein S2                                                            | 1.71  |
| 1420376_a_at                                         | NM_008211 | H3 histone, family 3B                                                           | 1.64  |
| 1426195_a_at                                         | AF483486  | Cystatin C                                                                      | 1.54  |
| 1416901_at                                           | BC007190  | Niemann Pick type C2                                                            | 1.51  |
| <b>Genes down-regulated at the disease end stage</b> |           |                                                                                 |       |
| 1459717_at                                           | AW045505  |                                                                                 | -2.19 |
| 1436087_at                                           | BQ176414  | Dipeptidylpeptidase 10                                                          | -2.10 |
| 1426871_at                                           | BM939903  | F-box only protein 33                                                           | -2.02 |
| 1456862_at                                           | AI893638  |                                                                                 | -1.89 |
| 1428662_a_at                                         | AK009007  | Homeobox only domain                                                            | -1.81 |
| 1423294_at                                           | AW555393  | Mesoderm specific transcript                                                    | -1.78 |
| 1433868_at                                           | AV028445  |                                                                                 | -1.72 |
| 1422638_s_at                                         | NM_018750 | Ras association (RalGDS/AF-6) domain family 5                                   | -1.62 |

**Supplementary Table 4 :** Sequences of oligonucleotide primer pairs used for real time quantitative PCR

| <b>Gene name</b> | <b>Description</b>                            | <b>Forward primer (5' - 3')<br/>Reverse primer (5' - 3')</b> |
|------------------|-----------------------------------------------|--------------------------------------------------------------|
| Rps9             | Mitochondrial ribosomal protein S9            | GACCAGGAGCTAAAGTTGATTGGA<br>TCTTGGCCAGGGTAAACTTGA            |
| Gapdh            | Glyceraldehyde-3-phosphate dehydrogenase      | TCCATGACAACCTTTGGCATTG<br>CAGTCTTCTGGGTGGCAGTGA              |
| Gja1             | Gap junction membrane channel protein alpha 1 | CTTGATTCTGAGTTTAACAGTCTTTTAGATTG<br>CCTTCACCCCCTCTAGTATCTCAA |
| Grin1            | Glutamate receptor, ionotropic, NMDA1 (zeta1) | CTAGGGCTCCAGACTCCAAGAG<br>CCAGCGTCTGAGGAAGCCTAT              |
| Nov              | Nephroblastoma overexpressed gene             | GCCTCTCAGCTCATGGTTTGT<br>GAGTCCCTGTTTAATTTTGAAGAAGTG         |
| Hexb             | Hexosaminidase B                              | TCACTGACCTAGAAAATGCCTACAA<br>CTATTCCACGGCTGACCATTC           |
| Mmp13            | Matrix metalloproteinase 13                   | TGGTCAGTCGCCCTTTTGAG<br>GCTAAGGAAAGCAGAGAGGGATT              |
| Gap43            | Growth associated protein 43                  | TGGCGAGTTTTTGGTAATGATG<br>CACGCACCAGATCAAAAAACC              |
| Vim              | Vimentin                                      | CCTCTGGTTGACACCCACTCA<br>GTCTCATTGATCACCTGTCCATCT            |
| Rex3             | Reduced expression 3                          | TCACTATAGATGGGACCTGATGCA<br>ACCCCCAAACCTCTGTACGTT            |
| XIAP             | X-linked inhibitor of apoptosis protein       | ITTGGGCCGGAACGTTAAT<br>TTGTTGAATTTGGGAAATTCCTAT              |
| TNF $\alpha$     | Tumor necrosis factor alpha                   | GACCCTCACACTCAGATCATCTTCT<br>CCACTTGGTGGTTTGCTACGA           |
| Bax              | Bcl2-associated X protein                     | TGGAGCTGCAGAGGATGATTG<br>AGCTGCCACCCGGAAGA                   |
| Casp-1           | Caspase-1                                     | CATGCCGTGGAGAGAAACAA<br>CATCCGTAAAGAAATCCTCTTCAG             |
| Casp-3           | Caspase-3                                     | CTGGACTGTGGCATTGAGACA<br>GCCTCCACCGGTATCTTCTG                |
| Casp-7           | Caspase-7                                     | AAAATGGTTGGTTATTACTCATGGA<br>GCAGAGGGCCTGCACAAA              |
| Casp-9           | Caspase-9                                     | GAGCTCATGATGTCTGTGTTC<br>GAATCCAGGGTGTATGCCATATC             |
| ChAT             | Choline acetyltransferase                     | ACCCAGTGGTGCACATGGTA<br>GGGCCCATAGCATGTGATG                  |
| NF-H             | Neurofilament, heavy polypeptide              | GGATGACAAGAGCCTTTCCAAA<br>GAGGATTTTTCAGCCTTTTCTGTCT          |
| CGRP             | Calcitonin gene-related peptide               | ACTCCTGGTTCCGGTCCAA<br>CCTGGGTACTCTGGCAACAAG                 |
